# Supplementary material
Source: PubMed Central journal article supplement (PMC6207316)
Supplement: ahdb-11-293-s1.pdf [file ahdb-11-293-s1.pdf]

## **Appendix**

### **Analysis of Real-World Dosing Patterns for the 3 FDA-Approved Medications in the Treatment of Fibromyalgia**

Craig White, PhD; Wingham Jacqueline Kwong, PharmD, PhD; Hilary Armstrong, MPhil; Michael Behling; Jeffrey Niemira; Kathy Lang, PhD

This Appendix has not been edited and is provided as supplemental materials for this article, which was published in *American Health & Drug Benefits* in September 2018.

#### **Appendix 1 [Table 1]: Diagnostic codes used to identify comorbidities**

| <b>Charlson Comorbidities</b>                                                      |                                                                                                         |
|------------------------------------------------------------------------------------|---------------------------------------------------------------------------------------------------------|
| <b>Condition</b>                                                                   | <b>ICD-9 CM Codes</b>                                                                                   |
| AIDS/HIV                                                                           | 042.x – 044.x                                                                                           |
| Any malignancy, including lymphoma and leukemia, except malignant neoplasm of skin | 140.x-172.x, 174.x-195.8, 200.x-208.x, 238.6                                                            |
| Cerebrovascular disease                                                            | 362.34, 430.x-438.x                                                                                     |
| Chronic pulmonary disease                                                          | 416.8, 416.9, 490.x-505.x, 506.4, 508.1, 508.8                                                          |
| Congestive heart failure                                                           | 398.91, 402.01, 402.11, 402.91, 404.01, 404.03, 404.11, 404.13, 404.91, 404.93, 425.4-425.9, 428.x      |
| Dementia                                                                           | 290.x, 294.1, 331.2                                                                                     |
| Depression                                                                         | V79.0, 311, 300.4, 296.2x, 296.3x, 298.0, 309.0, 309.1                                                  |
| Diabetes without chronic complications                                             | 250.0 – 250.3, 250.7, 250.8, 250.9                                                                      |
| Diabetes with chronic complications                                                | 250.4 – 250.7                                                                                           |
| Hemiplegia or paraplegia                                                           | 334.1, 342.x, 343.x, 344.0-344.6, 344.9                                                                 |
| Metastatic solid tumor                                                             | 196.x-199.x                                                                                             |
| Mild liver disease                                                                 | 070.22, 070.23, 070.32, 070.33, 070.44, 070.54, 070.6, 070.9, 570.x, 571.x, 573.3, 573.4, 573.8, 573.9, |

|                                                   |                                                                                                                                      |
|---------------------------------------------------|--------------------------------------------------------------------------------------------------------------------------------------|
|                                                   | V42.7                                                                                                                                |
| Moderate or severe liver disease                  | 456.0-456.2, 572.2 – 572.8                                                                                                           |
| Myocardial infarction                             | 410.x, 412.x                                                                                                                         |
| Peptic ulcer disease                              | 531.x – 534.x                                                                                                                        |
| Peripheral vascular disease                       | 093.0, 437.3, 440.x, 441.x, 443.1-443.9, 047.1, 557.1, 557.9, V43.4, Procedure 38.48                                                 |
| Renal disease                                     | 403.01, 403.11, 403.91, 404.02, 404.03, 404.12, 404.13, 404.92, 404.93, 582.x, 583.0-583.7, 585.x, 586.x, 588.0, V42.0, V45.1, V56.x |
| Rheumatologic disease (connective tissue disease) | 710.0, 710.1, 710.4, 714.0 – 714.2, 714.81, 725.x                                                                                    |
| <b>Other Comorbidities</b>                        |                                                                                                                                      |
| Fatigue Disorders                                 | 780.7, 780.71, 780.79                                                                                                                |
| Hypertension                                      | 401.x, 402.xx, 403.xx, 404.xx, 405.xx, 459.3x, 997.91                                                                                |
| Depression                                        | 296.2x, 296.3x, 298.0, 300.4, 309.1, 311, V79.0                                                                                      |
| Anxiety                                           | 300.02, 293.84, 300.00, 300.09, 300.4, 308.28, 309.21, 309.24, 313.0                                                                 |
| Migraine/Headache                                 | 307.81, 339.1x, 339.2x, 339.3, 339.4x, 339.8x, 349.0, 346.xx, 784.0                                                                  |
| Musculoskeletal pain disorders                    | 338.29, 338.4, 359.4, 715.xx, 710.4, 714.0, 714.1, 714.2, 723.0, 724.0x, 710.0                                                       |
| Neuropathic pain disorders                        | 250.6x, 357.2, 053.13, 333.94                                                                                                        |
| Gastrointestinal disorders                        | 530.11, 530.81                                                                                                                       |
| Obesity                                           | 278.0x, V77.8                                                                                                                        |
| Epilepsy                                          | 345.x                                                                                                                                |

|                |                                                                                                                                                                                                                                                        |
|----------------|--------------------------------------------------------------------------------------------------------------------------------------------------------------------------------------------------------------------------------------------------------|
| Sleep Disorder | 327.1x, 780.53, 780.54, 046.72,<br>327.0x, 780.51, 780.52, V69.4,<br>347.0x, 347.1x, 327.20, 780.57,<br>307.4x, 327.3x, 327.42, 327.43,<br>327.52, 327.53, 327.59, 327.8, 780.50,<br>780.53, 780.55, 780.56, 780.57,<br>780.58, 780.59, 291.82, 292.85 |
|----------------|--------------------------------------------------------------------------------------------------------------------------------------------------------------------------------------------------------------------------------------------------------|

**Appendix 2 [Table 2]: Classifications for Fibromyalgia related drugs**

| <b>Category</b> | <b>Generic drug names</b>                                                                                                                                                                                                                                                                                                                                                                                                                      |
|-----------------|------------------------------------------------------------------------------------------------------------------------------------------------------------------------------------------------------------------------------------------------------------------------------------------------------------------------------------------------------------------------------------------------------------------------------------------------|
| Anticonvulsants | Acetazolamide, Carbamazepine, Divalproex sodium, Ethosuximide, Ethotoin, Felbamate, Gabapentine, Lacosamide, Lamotrigine, Levetiracetam, Methosuximide, Oxcarbazepine, Perampanel, Phenytoin, Pregabalin, Primidone, Tiagabine, Toprimate, Valproic acid, Zonisamide                                                                                                                                                                           |
| Antidepressants | Bupropion, Hydracarbazine, Isocarboxazid, Isoniazid, Phenelzine, Procarbazine, Rasagiline, Selegiline, Tranylcypromine, Desvenlafaxine, Duloxetine, Levomilnacipran, Milnacipran, Venlafaxine, Citalopram, "Escitalopram, Fluoxetine, Fluvoxamine, Paroxetine, Sertraline, Loxapine, Maprotiline, Mirtazapine, Trazodone, Amitriptyline, Amoxapine, Clomipramine, Desipramine, Doxepin, Imipramine, Nortriptyline, Protriptyline, Trimipramine |
| TCAs            | Amitriptyline, Amoxapine, Clomipramine, Desipramine, Doxepin, Imipramine, Nortriptyline, Protriptyline, Trimipramine                                                                                                                                                                                                                                                                                                                           |

|                           |                                                                                                                                          |
|---------------------------|------------------------------------------------------------------------------------------------------------------------------------------|
| SSRIs                     | Citalopram, Escitalopram, Fluoxetine, Fluvoxamine, Paroxetine, Sertraline                                                                |
| SNRIs                     | Desvenlafaxine, Duloxetine, Levomilnacipran, Milnacipran, Venlafaxine                                                                    |
| Anti-migraine             | Almotriptan, Avitriptan, Eletriptan, Frovatriptan, Naratriptan, Rizatriptan, Sumatriptan, Zolmitriptan                                   |
| Gastroenterologics        | Dolasetron, Granisetron, Metoclopramide, Ondansetron, Dexlansoprazole, Esomeprazole, Lansoprazole, Omeprazole, Pantoprazole, Rabeprazole |
| NSAIDs: non-selective     | Diclofenac , Fenoprofen, Flurbiprofen, Ibuprofen, Indomethacin, Ketoprofen, Meloxicam, Naproxen, Oxaprozin, Piroxicam, Sulindac          |
| Skeletal muscle relaxants | Baclofen, Carisoprodol, Chlorzoxazone, Cyclobenzaprine, Dantrolene, Metaxalone, Methocarbamol , Orphenadrine , Tizanidine                |
| Sedative/hypnotics        | Eszopiclone, Flurazepam, Halazepam, Meprobamate, Ramelteon, Zaleplon, Zolpidem                                                           |

|                         |                                                                                                                                                                                                                                           |
|-------------------------|-------------------------------------------------------------------------------------------------------------------------------------------------------------------------------------------------------------------------------------------|
| Oral corticosteroids    | Betamethasone, Budesonide, Cortisone acetate, Dexamethasone, Fludrocortisone, Hydrocortisone, Methylprednisolone, Prednisolone, Prednisone, Triamcinolone                                                                                 |
| Topical corticosteroids | Alclometasone, Amcinonide, Betamethasone, Clobetasol propionate, Clo cortolone, Desonide, Desoximetasone, Desoximetasone, Diflorasone, Fluocinonide, Flurandrenolide, Halcinonide, Halobetasol, Mometasone , Prednicarbate, Triamcinolone |
| Opioids: Long Acting    | Fentanyl ER transdermal, Hydrocodone bitartrate ER, Hydromorphone HCl ER, Methadone HCl, Morphine sulfate ER, Oxycodone HCl, Oxymorphone HCl ER                                                                                           |
| Opioids: Short Acting   | Codiene, Fentanyl citrate, Hydrocodone, Hydromorphone, Meperidine, Morphine, Oxycodone, Oxymorphone IR, Propoxyphene, Tapentadol                                                                                                          |
| Topical analgesics      | Capsaicin cream, Capsaicin transdermal patch, Lidocaine cream, Lidocaine gel, Lidocaine lotion, Lidocaine ointment, Lidocaine spray, Lidocaine transdermal patch                                                                          |
| Benzodiazepines         | Clonazepam, Clobazam, Clorazepate, Cloxazolam, Diazepam, Lorazepam,                                                                                                                                                                       |

|  |           |
|--|-----------|
|  | Midazolam |
|--|-----------|
